# Supplementary material for: Emerging Role of Kinin B1 Receptor in Persistent Neuroinflammation and Neuropsychiatric Symptoms in Mice Following Recovery from SARS-CoV-2 Infection
Source: MDPI journal article supplement (doi:10.3390/cells12162107), 2023-08-19
Supplement: s1 [file s1]

## **SUPPLEMENTARY DATA**

### **Emerging role of kinin B1 receptor in persistent neuroinflammation and neuropsychiatric symptoms in mice following recovery from SARS-CoV-2 infection**

Srinivas Srinamula<sup>1\*</sup>, Drew Theobald<sup>1</sup>, Rohan Umesh Parekh<sup>1</sup>, Shaw M. Akula<sup>2</sup>, Dorcas P. O'Rourke<sup>3</sup>, and Jeffrey B. Eells<sup>4\*</sup>

<sup>1</sup>Department of Pharmacology and Toxicology, <sup>2</sup>Department of Microbiology and Immunology, <sup>3</sup>Department of Comparative Medicine, <sup>4</sup>Department of Anatomy and Cell Biology, Brody School of Medicine at East Carolina University, Greenville, NC 27834, USA.

#### **\*Corresponding Authors:**

Dr. Srinivas Srinamula, PhD  
Department of Pharmacology and Toxicology,  
Brody School of Medicine, East Carolina University  
600 Moye Blvd,  
Greenville, NC 27834, USA.  
Phone number: +1 252-744-2746  
Fax number: +1 252-744-3203  
E-mail: [srinamulas17@ecu.edu](mailto:srinamulas17@ecu.edu)

Dr. Jeffrey B. Eells, PhD  
Department of Anatomy and Cell Biology,  
Brody School of Medicine, East Carolina University  
600 Moye Blvd,  
Greenville, NC 27834, USA.  
Phone number: +1 252-744-2819  
Fax number: +1 252-744-2850  
E-mail: [eellsj17@ecu.edu](mailto:eellsj17@ecu.edu)

**Table S1. Primer sequences used for real-time quantitative reverse transcriptase polymerase chain reaction (qRT-PCR).**

| <b>Gene</b>    | <b>Forward primer (5'-3')</b> | <b>Reverse primer (5'-3')</b> |
|----------------|-------------------------------|-------------------------------|
| IL-6           | TCC TTA GCC ACT CCT TCT GT    | AGC CAG AGT CCT TCA GAG A     |
| TNF            | TCT TTG AGA TCC ATG CCG TTG   | AGA CCC TCA CAC TCA GAT CA    |
| B1R            | AGA TCA GAA GCT GCC AAG TTA G | TCC TGT CCT TCT TCC TTT TGC   |
| AT1R           | GGC TGG CAT TTT GTC TGG ATA   | CAG TAG AAG AGT TAA GGG CCA T |
| $\beta$ -Actin | GAC TCA TCG TAC TCC TGC TTG   | GAT TAC TGC TCT GGC TCC TAG   |

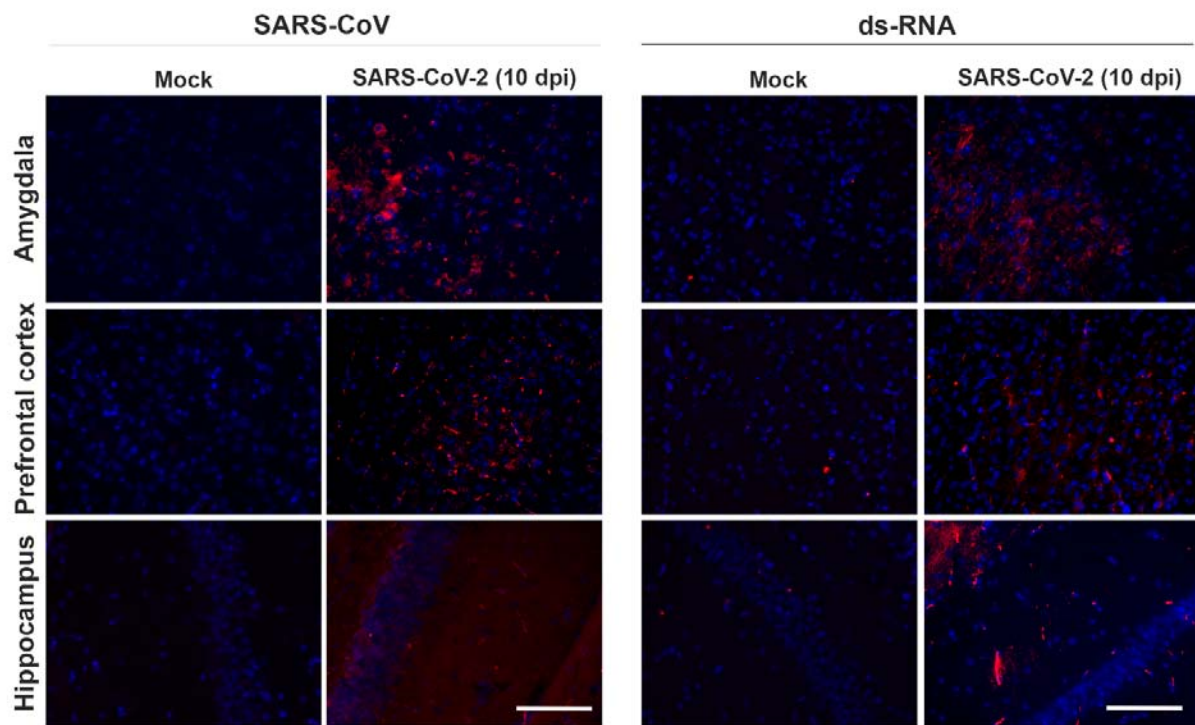

**Figure S1. SARS-CoV-2 infected K18-hACE2 mice show presence of virus in the brain.**

Representative images showing immunofluorescence staining of SARS-CoV virus and double stranded RNA (dsRNA) in amygdala, prefrontal cortex, and hippocampus of mock or virus infected mice. Staining reveals that SARS-CoV virus is detectable at 10 dpi in all 3 regions of virus infected mice compared to mock infected. Detection of dsRNA in 10 dpi mice indicates active viral replication compared to mock infected mice. Scale bar: 100  $\mu$ M.

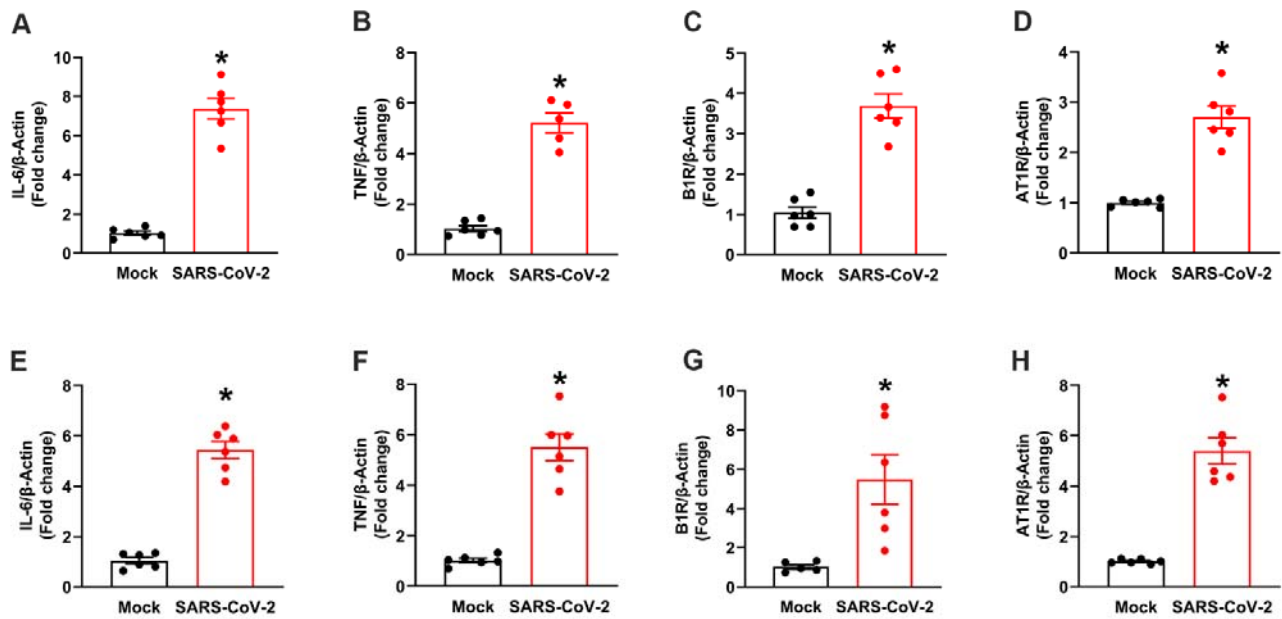

**Figure S2. SARS-CoV-2 infection increases inflammatory markers in the brain.**

Real time RT-PCR was used to measure mRNA expression of proinflammatory mediators in hippocampus and prefrontal cortex punches from mock and SARS-CoV-2 infected mice 45dpi. mRNA expression of IL-6, TNF, B1R, and AT1R is upregulated within the hippocampus (**A-D**) and prefrontal cortex (**E-H**) of SARS-CoV-2 infected mice compared to mock infected mice, indicating increased neuroinflammation.  $n=6$  per group. Data are mean  $\pm$  s.e.m. \* $p < 0.05$  (Student's t-test).

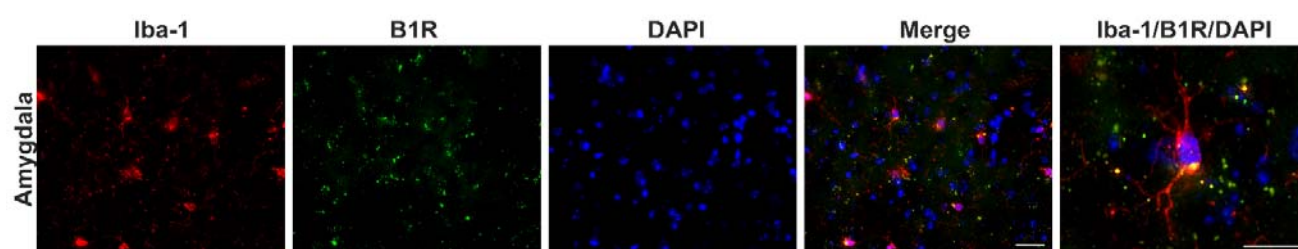

**Figure S3. Co-localized expression of B1R with microglia.**

Representative double immunofluorescence staining for microglia stained with ionized calcium-binding adaptor molecule 1 (Iba-1, red) and B1R expression (green) showing co-localization of B1R with microglia within the amygdala region of brain in SARS-CoV-2 infected mice. Scale bar: 100  $\mu$ M.

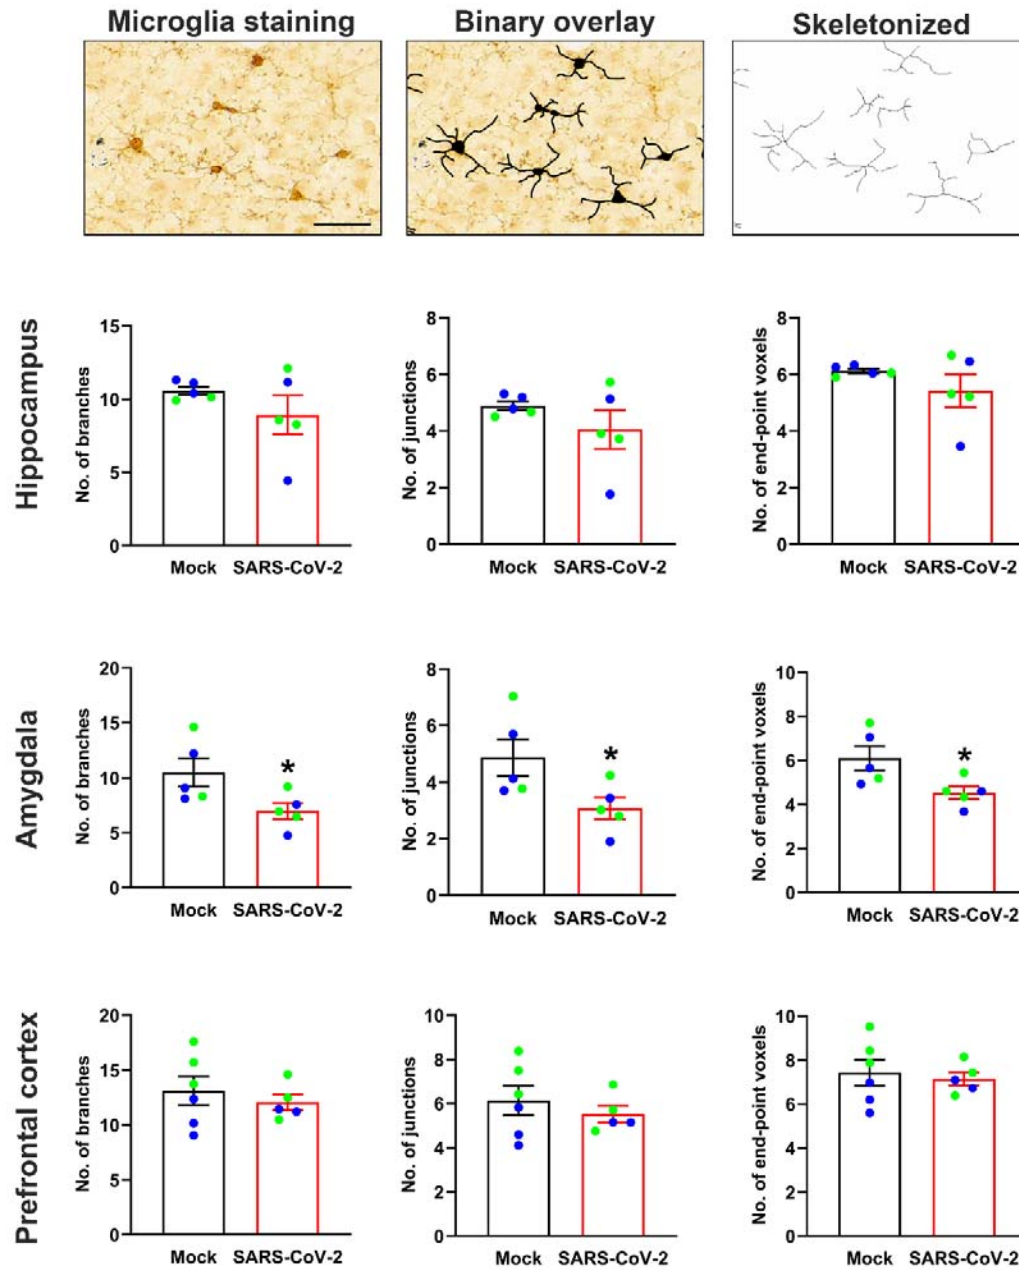

**Figure S4. Mild infection with SARS-CoV-2 and microglia ramifications in different brain regions.** Microglia morphology was quantified using photomicrographs of tissue in three different regions of the brain. The images were made binary, skeletonized, and analyzed using ImageJ plugins AnalyzeSkeleton (2D/3D) to determine the complexity of process branching (number of branches, number of junctions, and number of endpoints). Within the amygdala, there was a significant difference among the mock and SARS-CoV-2 infected groups for microglia in no. of branches, no. of junctions, and no. of end-point voxels. Blue data points represent male mice, green data points represent female mice. Data are mean  $\pm$  s.e.m. \* $p < 0.05$  (Student's t-test).
